# Supplementary material
Source: PubMed Central journal article supplement (PMC3728720)
Supplement: NIHMS493533-supplement-ESI.pdf [file NIHMS493533-supplement-ESI.pdf]

***In vitro* and *in vivo* study of sustained nitric oxide release coating using diazeniumdiolate-doped poly(vinyl chloride) matrix with poly(lactide-co-glycolide) additive**

Hitesh Handa<sup>a</sup>, Elizabeth J. Brisbois<sup>b</sup>, Terry C. Major<sup>a</sup>, Lahdan Refahiyat<sup>b</sup>, Kagya A. Amoako<sup>a</sup>, Gail M. Annich<sup>c</sup>, Robert H. Bartlett<sup>a</sup>, Mark E. Meyerhoff<sup>b,\*</sup>

<sup>a</sup>Department of Surgery, University of Michigan Medical Center, Ann Arbor, MI USA

<sup>b</sup>Department of Chemistry, University of Michigan, Ann Arbor, MI USA

<sup>c</sup>Department of Pediatrics and Communicable Diseases, University of Michigan Medical Center, Ann Arbor, MI, USA

\*Corresponding Author:

Mark E. Meyerhoff  
Department of Chemistry  
930 N. University Ave.  
Ann Arbor, MI 48109  
Telephone: (734) 764-2169  
E-mail: mmeyerho@umich.edu

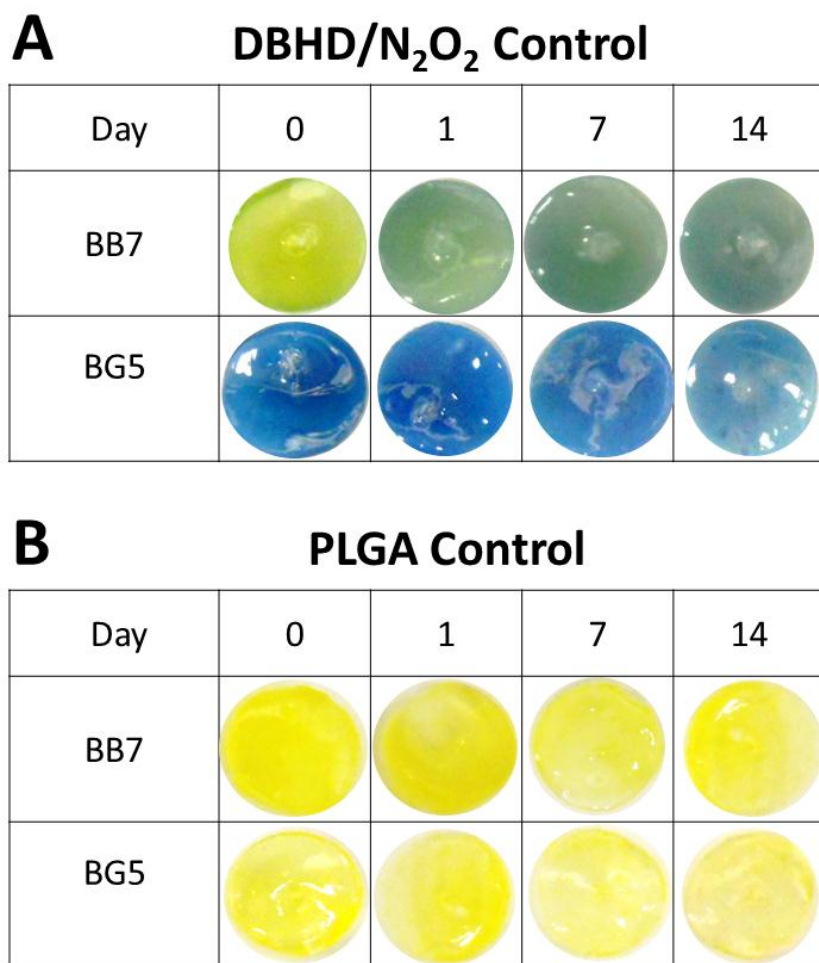

**Fig. S1.** Comparison of color changes of BG5 and BB7 doped with 25 wt% DBHD/N<sub>2</sub>O<sub>2</sub> in plasticized PVC polymer matrix (A). Comparison of color changes of BG5 and BB7 doped with 10 wt% of 5050DLG7E PLGA in plasticized PVC polymer matrix (B). All films were incubated at 37°C for 14 d in PBS buffer.

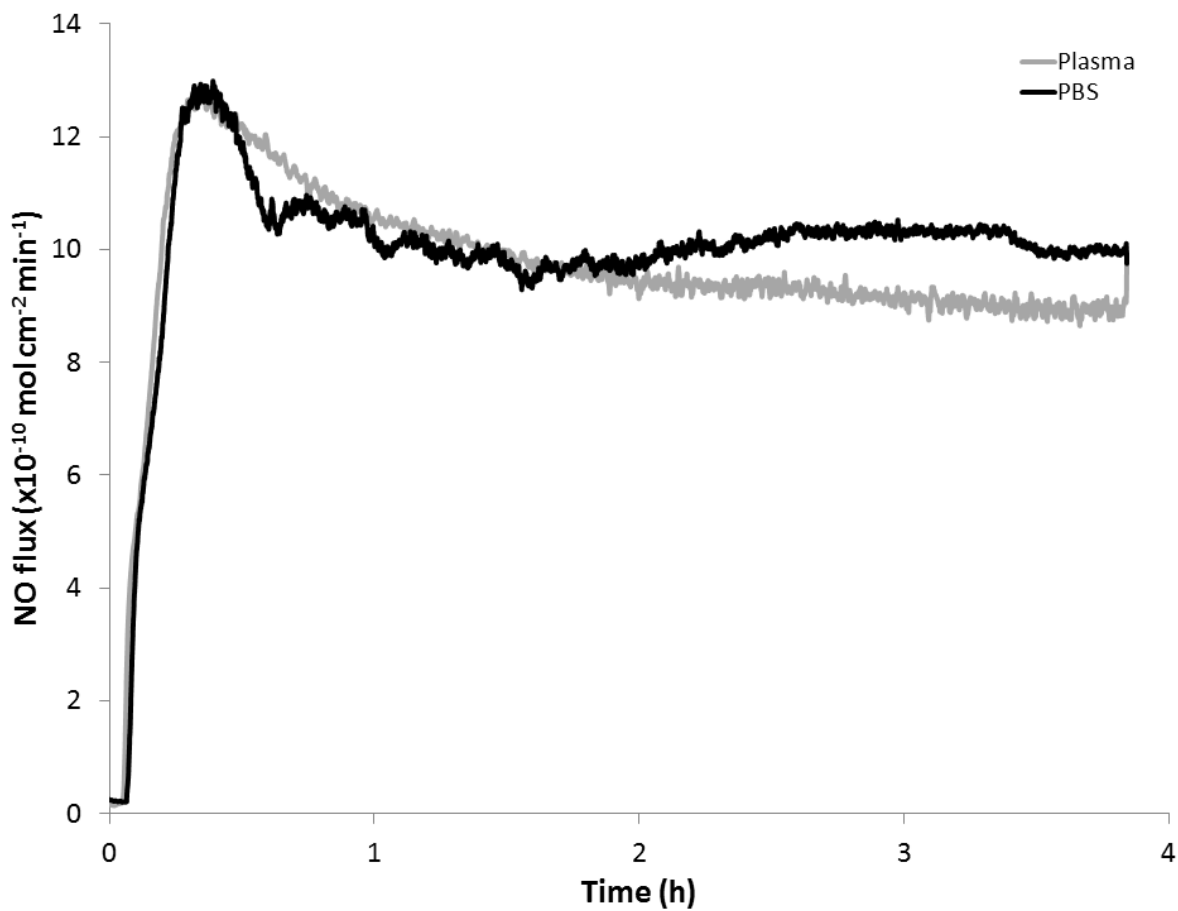

**Fig. S2.** NO release profile of plasticized PVC doped with 25 wt% DBHD/N<sub>2</sub>O<sub>2</sub> and 10 wt% 5050DLG7E as measured in PBS or rabbit plasma using chemiluminescence.

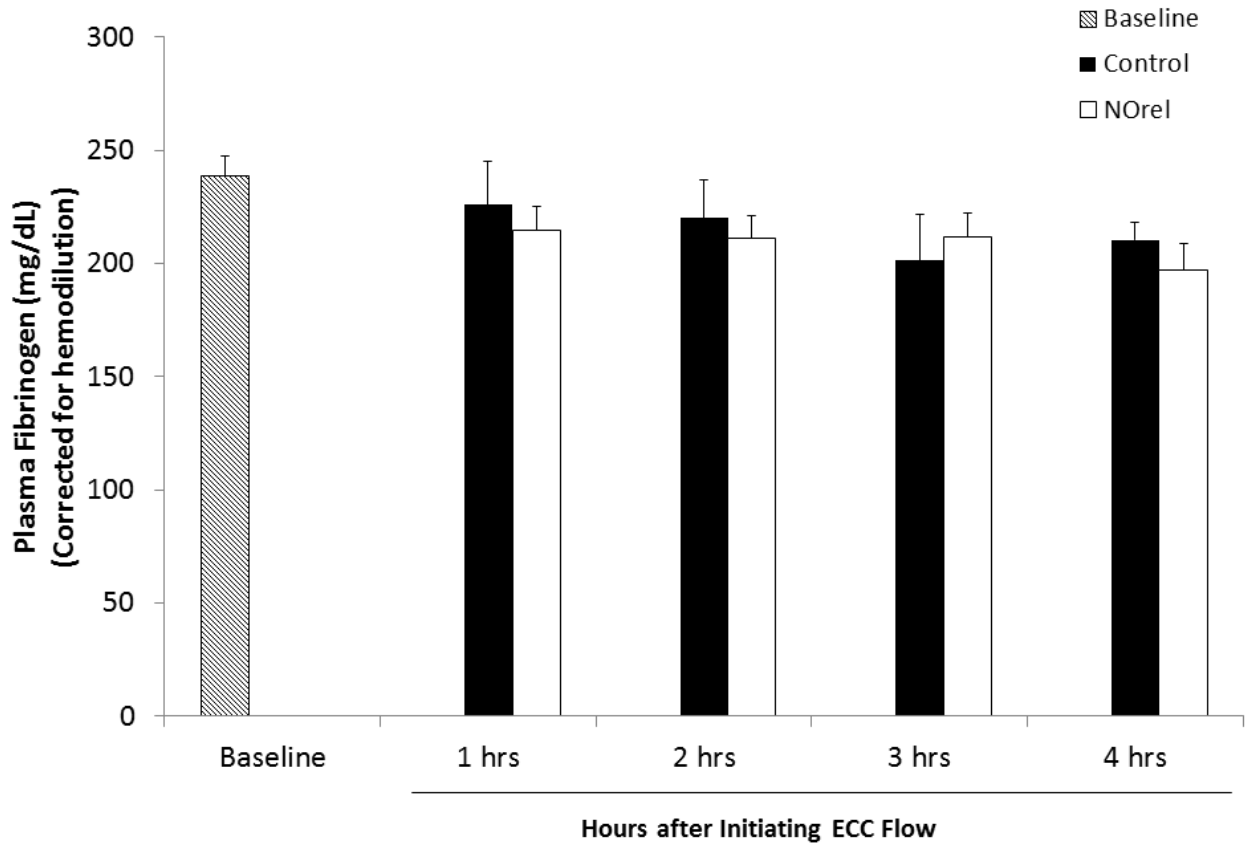

**Fig. S3.** Time-dependent effects of NOrel and control ECC loops on plasma fibrinogen levels during 4 h of blood flow in rabbit thrombogenicity study. The data are means  $\pm$  SEM.
